# Supplementary material for: Morphological, chemical and kinetic characterisation of zein protein-induced biomimetic calcium phosphate films
Source: Royal Society of Chemistry journal article supplement (doi:10.1039/c5tb00702j), 2015-01-01
Supplement: c5tb00702j1.pdf [file c5tb00702j1.pdf]

## Supplementary information

Supporting information.

### Supporting Information Figure Captions

**Figure S1.** X-ray diffraction patterns of a hydroxyapatite reference, zein and HDA-induced CaP films.

**Figure S2.** SEM showing the topology of the HDA-induced CaP film.

### Supporting Information Figures

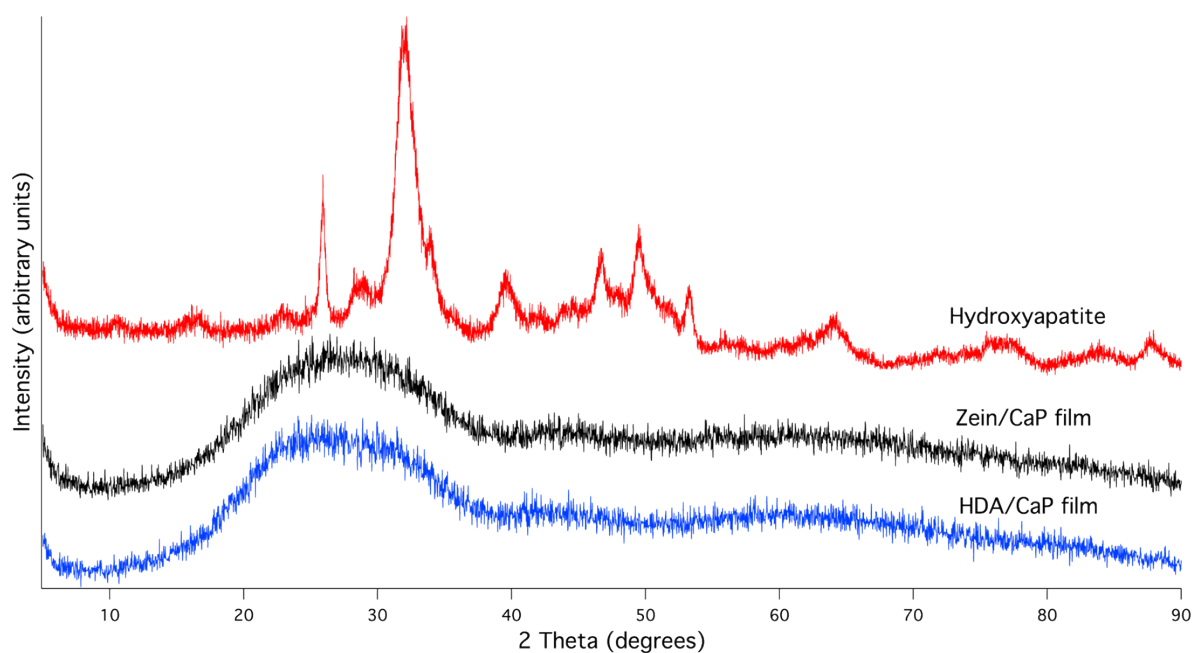

**Figure S1**

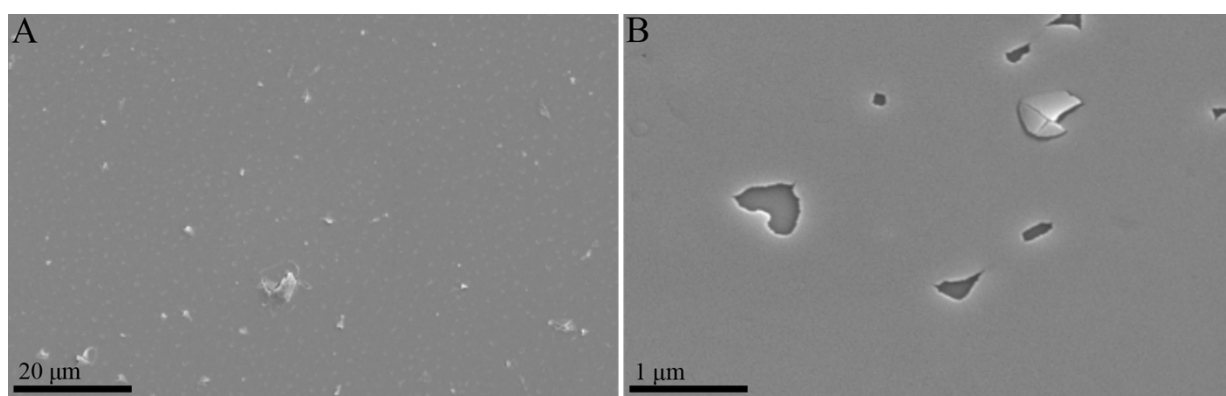

**Figure S2**
